# Supplementary material for: Multi-omics integration for neuroblastoma clinical endpoint prediction
Source: Biol Direct. 2018 Apr 3;13:5. doi: 10.1186/s13062-018-0207-8 (PMC5907722; doi:10.1186/s13062-018-0207-8)
Supplement: Supplementary file 5 — Table S9. The table provides the assignment of the 145 subset patients into the two groups G1 and G2 identified with the deep learning approach and characterized by distinct survival curves. For clarity we report also the TR/TS assignment. (XLSX 7.46 kb) [file 13062_2018_207_MOESM5_ESM.xlsx]

## Sheet: ST5_DL_patient_groups
NB_ID	DL_group	Training/Validation
NB001	G1	Training
NB002	G1	Validation
NB003	G1	Training
NB005	G1	Training
NB007	G1	Training
NB008	G1	Validation
NB010	G1	Validation
NB013	G2	Training
NB016	G1	Validation
NB019	G2	Training
NB022	G2	Validation
NB023	G2	Training
NB034	G1	Validation
NB038	G2	Validation
NB040	G2	Validation
NB050	G1	Validation
NB051	G2	Training
NB052	G2	Validation
NB056	G2	Validation
NB063	G2	Training
NB067	G2	Training
NB069	G1	Training
NB073	G2	Training
NB074	G1	Validation
NB075	G2	Training
NB076	G2	Validation
NB080	G1	Validation
NB083	G1	Training
NB084	G1	Validation
NB085	G1	Training
NB086	G1	Validation
NB088	G2	Validation
NB089	G1	Training
NB090	G1	Validation
NB091	G1	Training
NB092	G1	Validation
NB093	G1	Training
NB094	G1	Validation
NB099	G2	Training
NB101	G1	Training
NB106	G2	Validation
NB108	G1	Validation
NB109	G2	Training
NB113	G1	Training
NB117	G2	Training
NB119	G1	Training
NB120	G2	Validation
NB122	G1	Validation
NB123	G1	Training
NB124	G1	Validation
NB125	G2	Training
NB130	G2	Validation
NB136	G1	Validation
NB137	G1	Training
NB138	G1	Validation
NB140	G2	Validation
NB143	G2	Training
NB149	G1	Training
NB157	G2	Training
NB158	G2	Validation
NB160	G2	Validation
NB161	G2	Training
NB163	G2	Training
NB164	G2	Validation
NB167	G2	Training
NB168	G2	Validation
NB170	G2	Validation
NB177	G1	Training
NB178	G2	Validation
NB179	G2	Training
NB181	G2	Training
NB182	G2	Validation
NB184	G2	Validation
NB185	G2	Training
NB190	G2	Validation
NB196	G1	Validation
NB201	G2	Training
NB202	G2	Validation
NB204	G1	Validation
NB211	G2	Training
NB213	G2	Training
NB214	G2	Validation
NB218	G2	Validation
NB223	G2	Training
NB230	G2	Validation
NB231	G1	Training
NB232	G2	Validation
NB237	G1	Training
NB240	G1	Validation
NB242	G1	Validation
NB245	G1	Training
NB250	G2	Validation
NB251	G2	Training
NB257	G1	Training
NB261	G1	Training
NB266	G1	Validation
NB267	G1	Training
NB268	G1	Validation
NB270	G1	Validation
NB271	G1	Training
NB274	G2	Validation
NB275	G2	Training
NB278	G1	Validation
NB281	G2	Training
NB283	G2	Training
NB284	G1	Validation
NB285	G2	Training
NB286	G2	Validation
NB287	G2	Training
NB288	G2	Validation
NB289	G1	Training
NB291	G2	Training
NB292	G2	Validation
NB301	G2	Training
NB303	G2	Training
NB309	G2	Training
NB310	G2	Validation
NB311	G1	Training
NB313	G1	Training
NB314	G1	Validation
NB315	G2	Training
NB316	G1	Validation
NB359	G1	Training
NB360	G1	Validation
NB366	G2	Validation
NB383	G1	Training
NB384	G1	Validation
NB385	G1	Training
NB387	G2	Training
NB389	G1	Training
NB392	G1	Validation
NB393	G1	Training
NB394	G1	Validation
NB396	G1	Validation
NB397	G2	Training
NB398	G2	Validation
NB412	G1	Validation
NB421	G2	Training
NB432	G1	Validation
NB472	G2	Validation
NB473	G2	Training
NB474	G2	Validation
NB478	G1	Validation
NB496	G2	Validation
NB498	G2	Validation
